# Supplementary material for: Nanocosm: a well plate photobioreactor for environmental and biotechnological studies
Source: Royal Society of Chemistry journal article supplement (doi:10.1039/d0lc01250e), 2021-01-01
Supplement: d0lc01250e1.zip [file d0lc01250e1.zip]

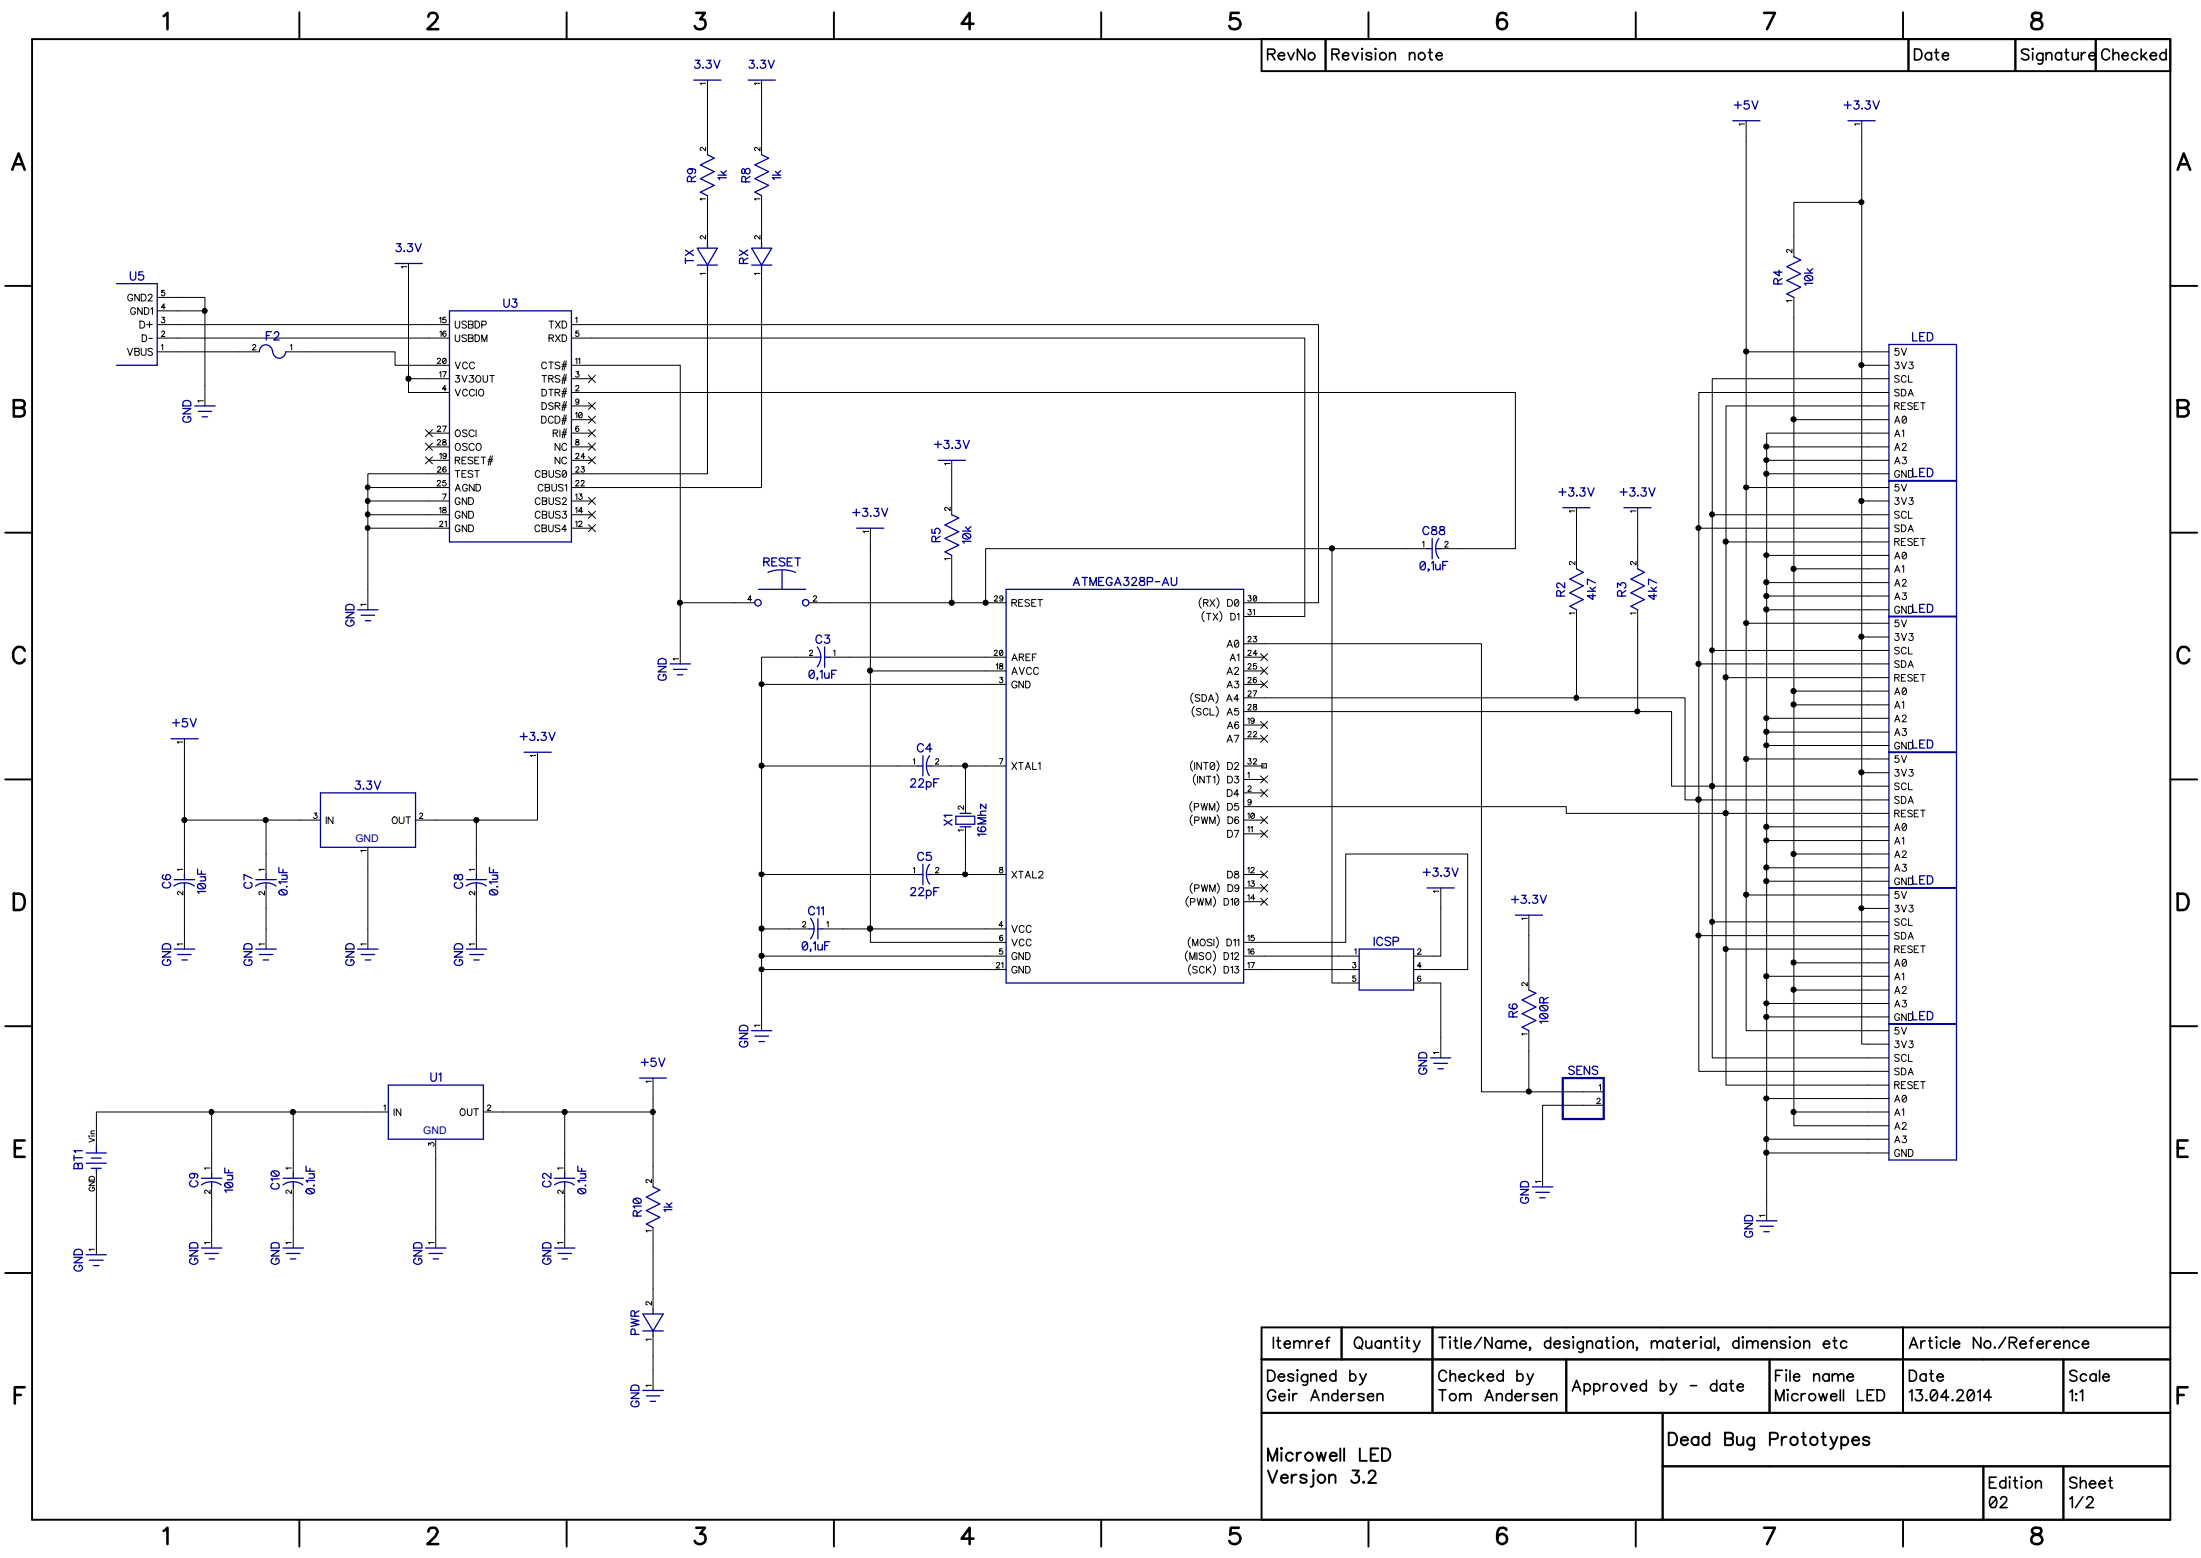

|                              |          |                                                  |                     |                            |                       |               |
|------------------------------|----------|--------------------------------------------------|---------------------|----------------------------|-----------------------|---------------|
| Itemref                      | Quantity | Title/Name, designation, material, dimension etc |                     |                            | Article No./Reference |               |
| Designed by<br>Geir Andersen |          | Checked by<br>Tom Andersen                       | Approved by - date  | File name<br>Microwell LED | Date<br>13.04.2014    | Scale<br>1:1  |
| Microwell LED<br>Versjon 3.2 |          |                                                  | Dead Bug Prototypes |                            |                       |               |
|                              |          |                                                  |                     |                            |                       | Edition<br>02 |

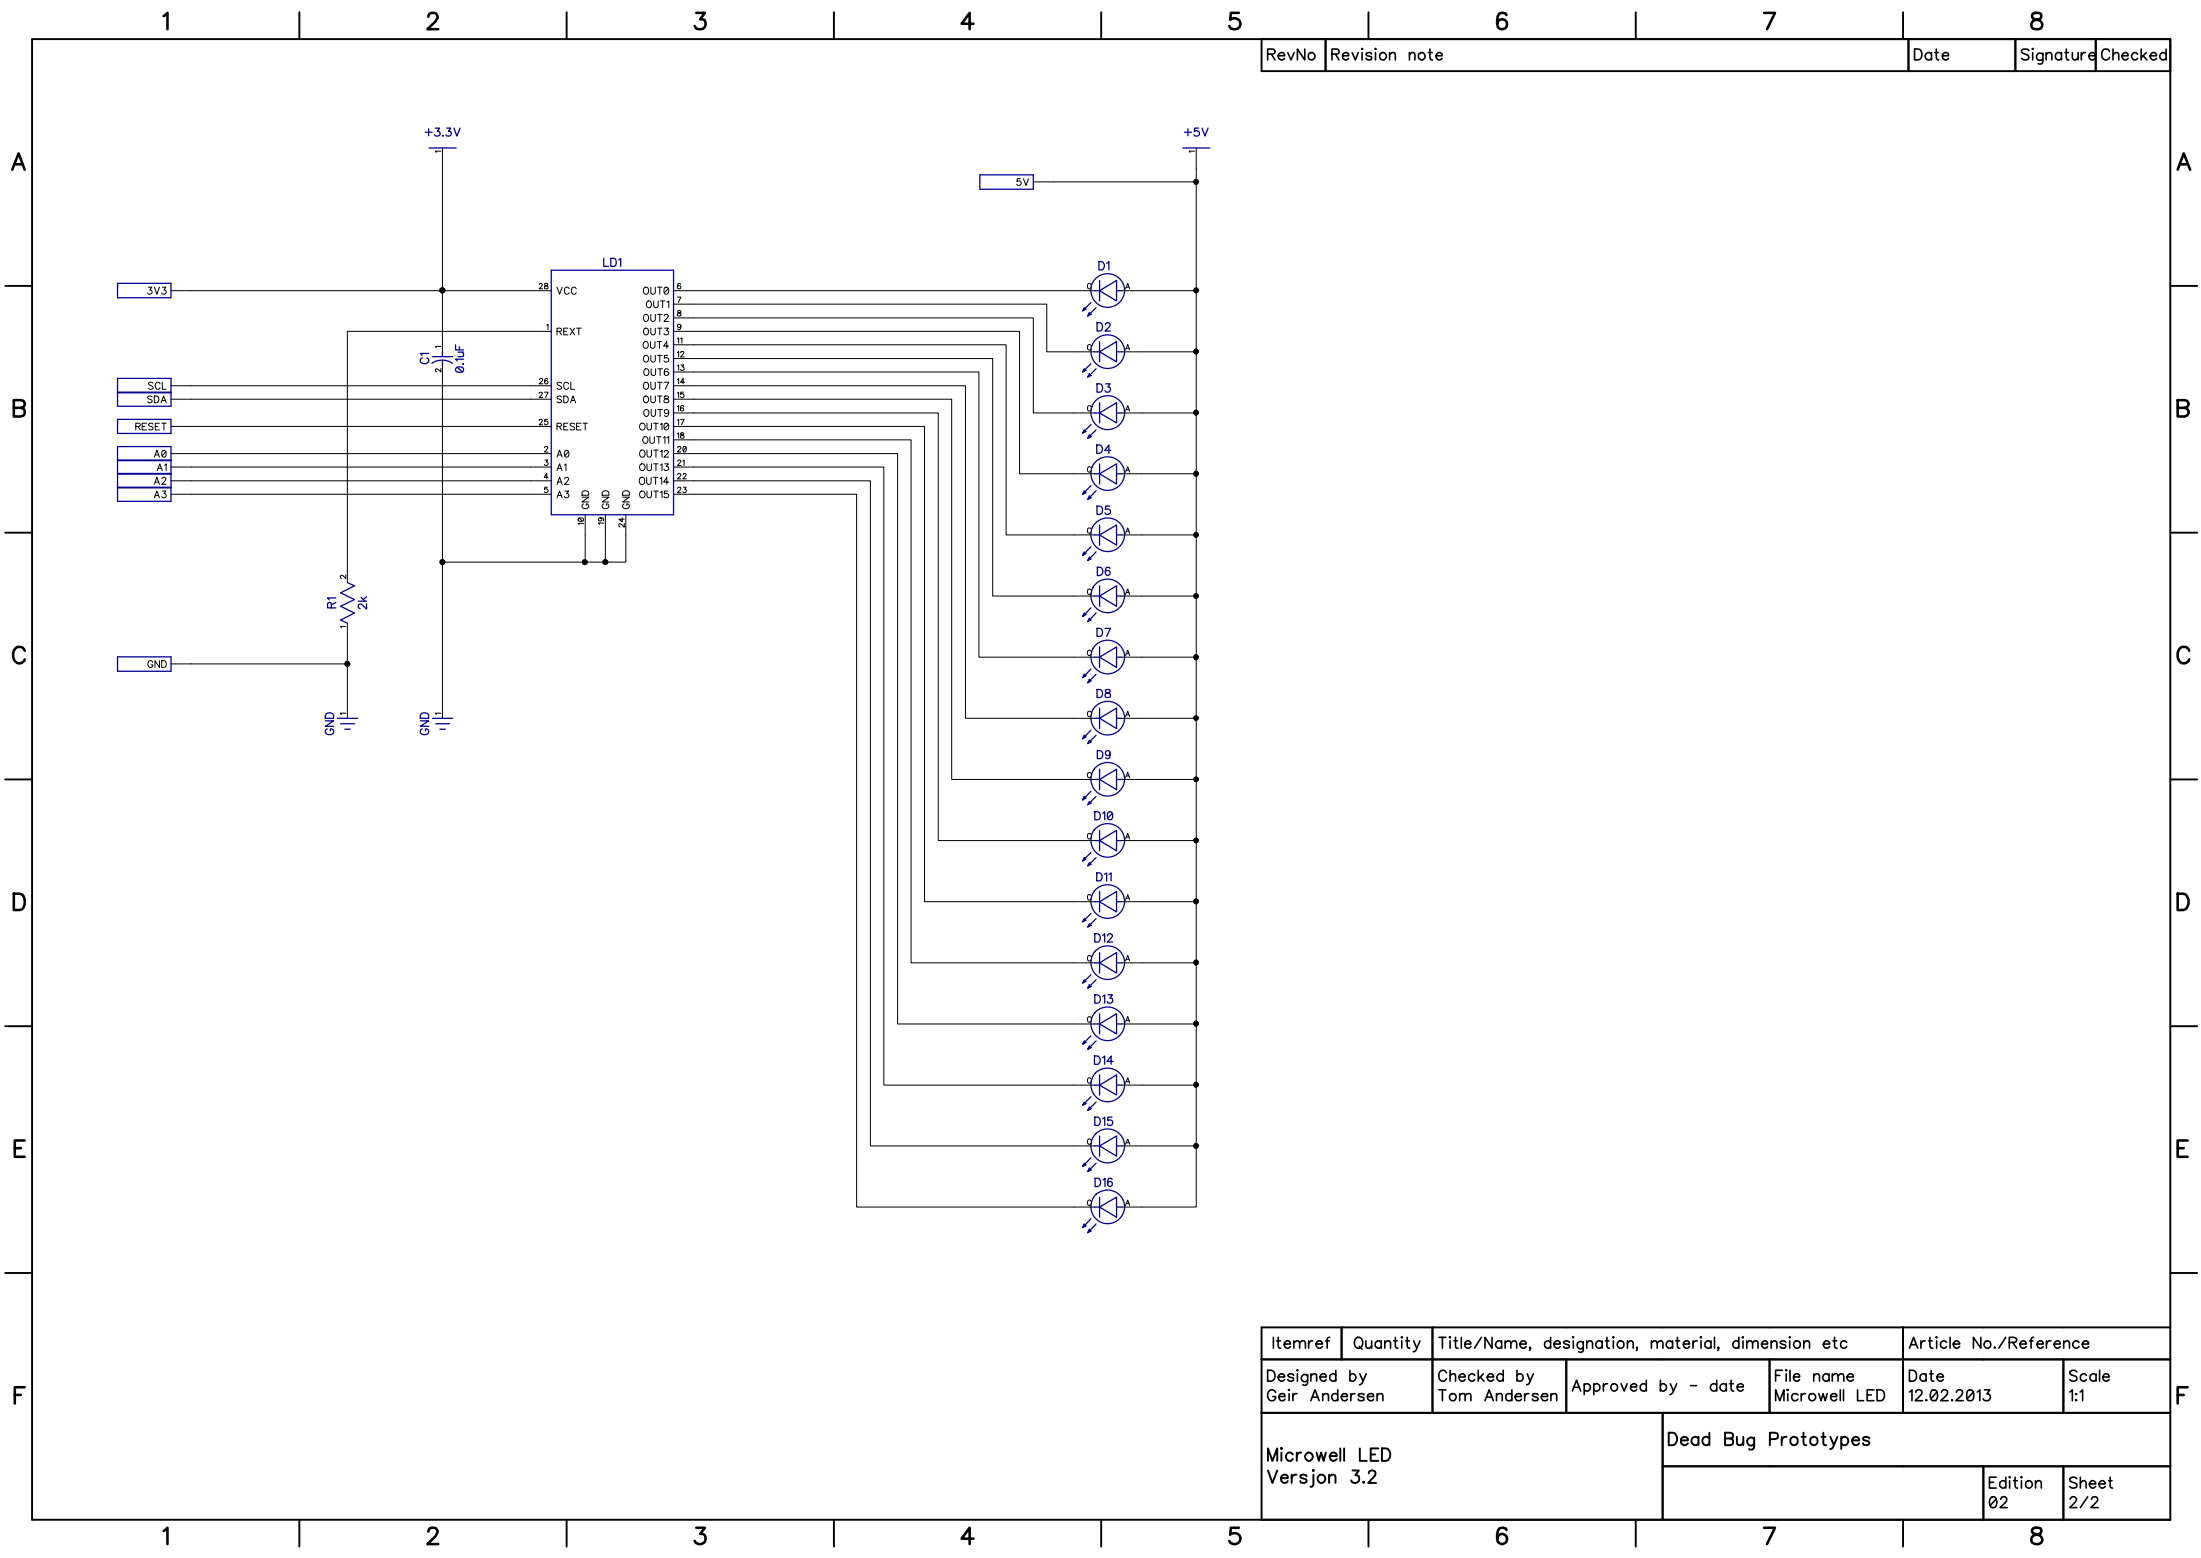

| RevNo | Revision note | Date | Signature | Checked |
|-------|---------------|------|-----------|---------|
|-------|---------------|------|-----------|---------|

| Itemref                      | Quantity | Title/Name, designation, material, dimension etc |                     |  | Article No./Reference      |              |
|------------------------------|----------|--------------------------------------------------|---------------------|--|----------------------------|--------------|
| Designed by<br>Geir Andersen |          | Checked by<br>Tom Andersen                       | Approved by - date  |  | File name<br>Microwell LED | Scale<br>1:1 |
| Microwell LED<br>Version 3.2 |          |                                                  | Dead Bug Prototypes |  |                            |              |
|                              |          |                                                  |                     |  | Edition<br>02              | Sheet<br>2/2 |
