# Supplementary material for: Nanocosm: a well plate photobioreactor for environmental and biotechnological studies
Source: Royal Society of Chemistry journal article supplement (doi:10.1039/d0lc01250e), 2021-01-01
Supplement: d0lc01250e1.zip [file d0lc01250e1.zip]

## Sheet: MTO
BT1	BAT barrel		1	Power Jack
C1	CAP_0805	0.1uF	6	CAP_0805
C2	CAP_0805	0.1uF	1	CAP_0805
C3	CAP_0805	0,1uF	1	CAP_0805
C4	CAP_0805	22pF	1	CAP_0805
C5	CAP_0805	22pF	1	CAP_0805
C6	CAP_0805	10uF	1	CAP_1510
C7	CAP_0805	0.1uF	1	CAP_0805
C8	CAP_0805	0.1uF	1	CAP_0805
C9	CAP_0805	10uF	1	CAP_1510
C10	CAP_0805	0.1uF	1	CAP_0805
C11	CAP_0805	0,1uF	1	CAP_0805
C88	CAP_0805	0,1uF	1	CAP_0805
F2	FUSE	MF-MSMF050-2 500mA	1	CAP_1812
LD1	TLC59116		6	TSSOP-28
PWR	DIODE_0805		1	DIO_0805
R1	RES_0805	1k5	6	RES_0805
R2	RES_0805	4k7	1	RES_0805
R3	RES_0805	4k7	1	RES_0805
R4	RES_0805	10k	1	RES_0805
R5	RES_0805	10k	1	RES_0805
R6	RES_0805	100R	1	RES_0805
R8	RES_0805	1k	1	RES_0805
R9	RES_0805	1k	1	RES_0805
R10	RES_0805	1k	1	RES_0805
RESET	Button SMD		1	SMD switch
RX	DIODE_0805		1	DIO_0805
SENS	PINHD-1X2		1	HDR-1x2
TX	DIODE_0805		1	DIO_0805
U1	L7806CV		1	TO-220V
U2	ATMEGA328P-AU		1	QFP-32/9x9x0.8
U3	FT232RL		1	SSOP-28
U4	AMS1117	3.3V	1	SOT223-4
U5	USB		1	USB SMD
U6	ICSP		1	HDR-2x3
X1	HC49/4H_SMX	16Mhz	1	HC-49
