# Supplementary material for: Nanocosm: a well plate photobioreactor for environmental and biotechnological studies
Source: Royal Society of Chemistry journal article supplement (doi:10.1039/d0lc01250e), 2021-01-01
Supplement: d0lc01250e2.pdf [file d0lc01250e2.pdf]

## Supplementary Information

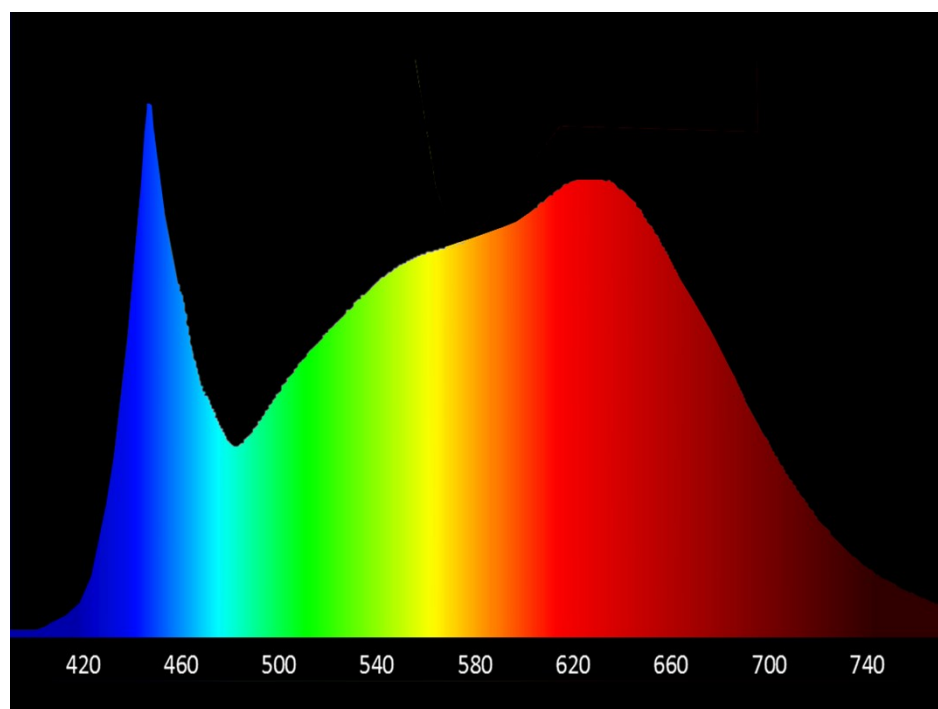

**Figure S1.** Spectrum of the 45W LED-light lamps used for the growth experiment of the control PBR batch cultures.

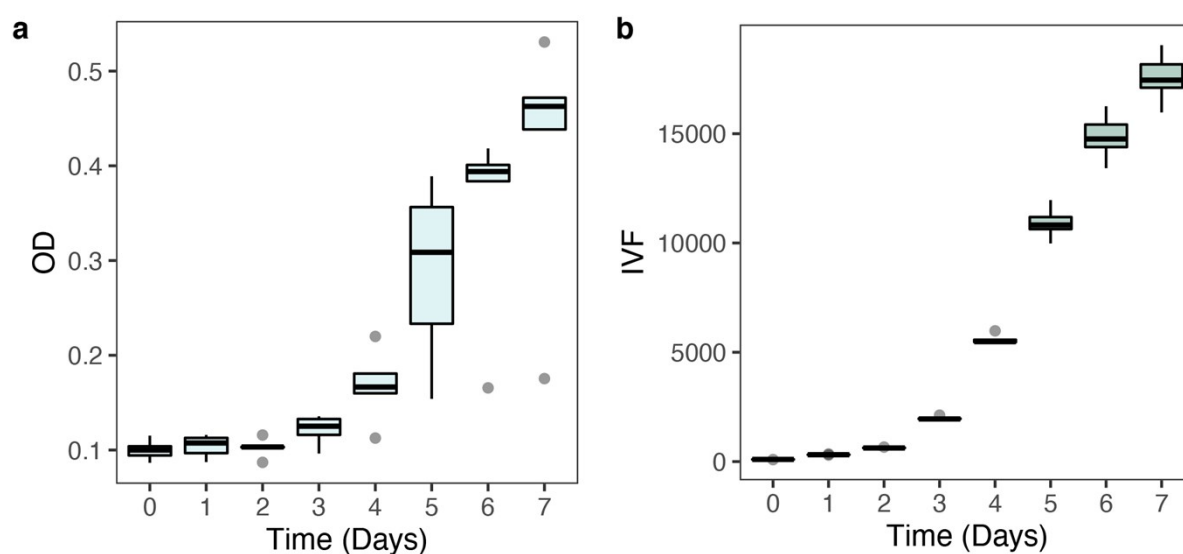

**Figure S2.** Box-plot representation of the within-well variability over a 7-days' time period. Results presented here are measurements from one randomly chosen well (B6) used as an example. Both optical density (A) and in vivo chl *a* fluorescence (B) were measured by using the multiple reads per well option where 5 different measurements points were performed for each well. The five measurements are represented by the filled circles.

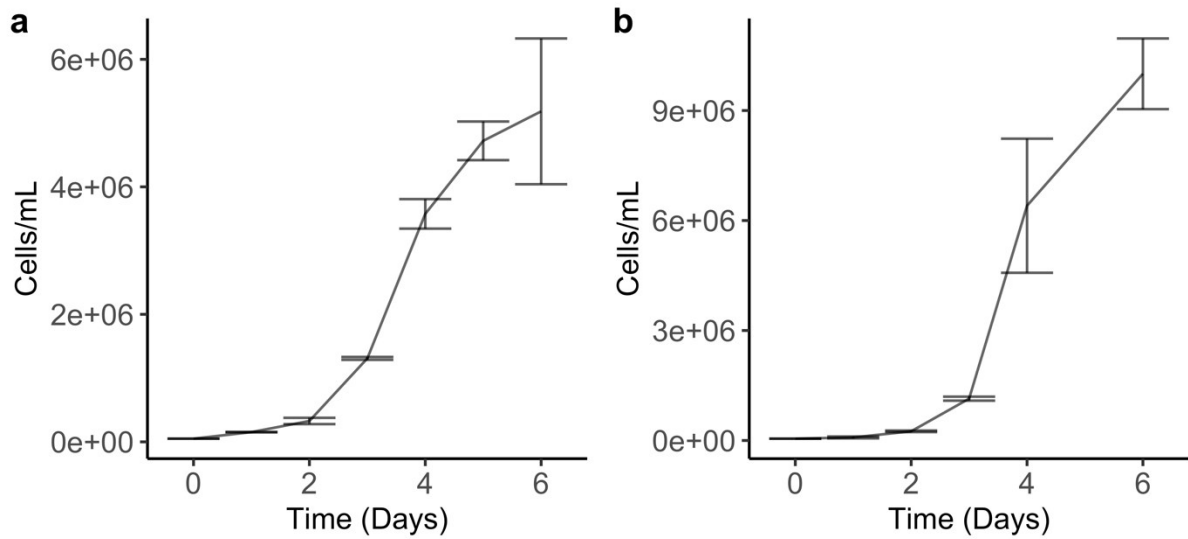

**Figure S3.** Growth curves of control cultures of *P. tricornutum* acclimated to low light ( $\sim 20 \mu\text{mol photons m}^{-2} \text{s}^{-1}$ ) (a) and high light ( $\sim 200 \mu\text{mol photons m}^{-2} \text{s}^{-1}$ ) (b) at  $16^\circ\text{C} \pm 1$ . Growth measurements were done by cell counting by using the BD Accuri C6 Flow Cytometer (BD Bioscience) every 24h for 7 consecutive days (including day 0). Results are presented as a mean of three biological replicates  $\pm$ SD.

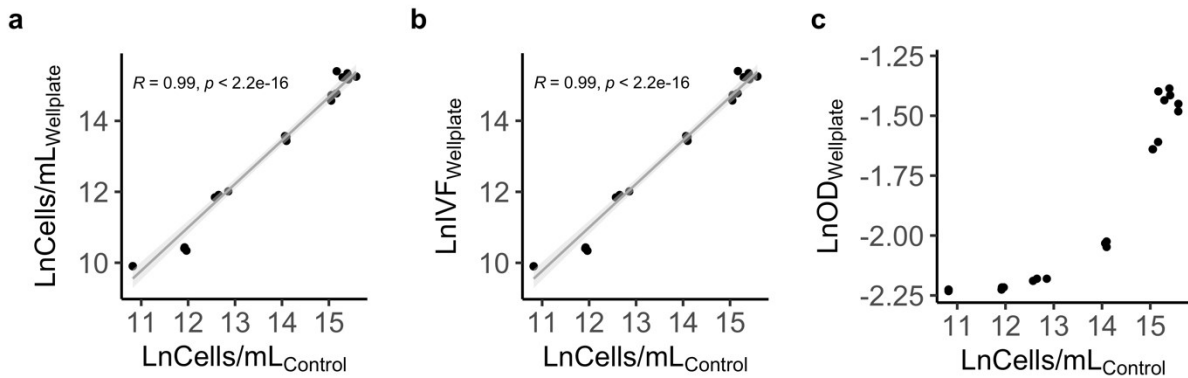

**Figure S4.** Scatter plot and best-fitting regression line illustrating the relationships between growth measurements performed in the well plate setting versus the control (Batch culture: 125 mL). (a) Cell count/mL<sub>Control</sub> vs. Cell count/mL<sub>Wellplate</sub>; (b) Cell count/mL<sub>Control</sub> vs. IVF<sub>Wellplate</sub>; (c) Cell count/mL<sub>Control</sub> vs. OD<sub>Wellplate</sub>. Regression line is only drawn for (a) and (b). Grey surrounding area: 95% confidence belt for the fitted line.

**Table S1.** Table summarizing the specific growth rate ( $\mu$ ,  $d^{-1}$ ) estimates based on the measurement performed. Results are presented for the quantification methods performed in the 96 well plate versus: control (a): represented by a standard batch PBR illuminated with the Nanocosm LED-light board and control (b): batch PBR illuminated with another LED light source (spectrum Figure S1). Values presented are from calculation performed between day 2 and 3 when growth is known to be highest.

| Light source                                                    | Nanocosm      |               |               | Nanocosm      | algae growth room |
|-----------------------------------------------------------------|---------------|---------------|---------------|---------------|-------------------|
| Culturing method                                                | 96 well plate |               |               | Batch PBR     | Batch PBR         |
| Biomass quantification method                                   | Cell count    | IVF           | OD            | cell count    | Cell count        |
| Specific growth rate ( $\mu$ , $d^{-1}$ )<br>$\ln(x_t/x_{t-1})$ | 1.56 $d^{-1}$ | 1.45 $d^{-1}$ | 0.14 $d^{-1}$ | 0.97 $d^{-1}$ | 1.52 $d^{-1}$     |
